# Supplementary material
Source: Springer Nature journal article supplement (https://www.springermedizin.de/resource/supplementary/13019_2013_1427_MOESM10_ESM.pdf/9640642)
Supplement: MOESM10 [file 9640642]

| Model  | Study name  | Subgroup within study | Statistics for each study |             |             |         |         | Hazard ratio and 95% CI |      |      |      |      |      |       |  |  |
|--------|-------------|-----------------------|---------------------------|-------------|-------------|---------|---------|-------------------------|------|------|------|------|------|-------|--|--|
|        |             |                       | Hazard ratio              | Lower limit | Upper limit | Z-Value | p-Value | 0.10                    | 0.20 | 0.50 | 1.00 | 2.00 | 5.00 | 10.00 |  |  |
|        | yixianhua   | 10.000                | 0.738                     | 0.606       | 0.897       | -3.043  | 0.002   |                         |      |      | +    |      |      |       |  |  |
|        | chenshaolia | 3.000                 | 0.108                     | 0.015       | 0.766       | -2.226  | 0.026   | +                       |      |      |      |      |      |       |  |  |
|        | noguchi     | 12.000                | 0.391                     | 0.159       | 0.958       | -2.054  | 0.040   |                         |      | +    |      |      |      |       |  |  |
|        | prasad      | 10.000                | 0.762                     | 0.601       | 0.966       | -2.241  | 0.025   |                         |      |      | +    |      |      |       |  |  |
|        | aziz        | 2.000                 | 0.256                     | 0.108       | 0.608       | -3.090  | 0.002   | +                       |      |      |      |      |      |       |  |  |
|        | hoye        | 5.000                 | 0.580                     | 0.367       | 0.918       | -2.326  | 0.020   |                         |      |      | +    |      |      |       |  |  |
| Fixed  |             |                       | 0.692                     | 0.602       | 0.796       | -5.168  | 0.000   |                         |      |      | +    |      |      |       |  |  |
| Random |             |                       | 0.595                     | 0.448       | 0.791       | -3.572  | 0.000   |                         |      |      | +    |      |      |       |  |  |
